# Supplementary material
Source: PubMed Central journal article supplement (PMC9918791)

**a**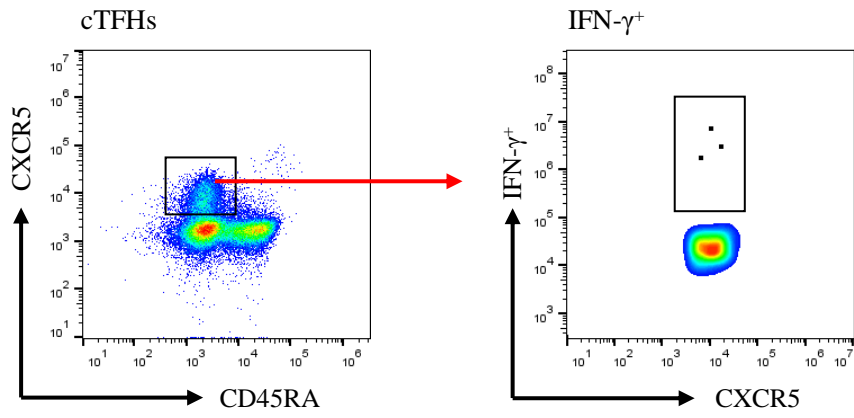**b**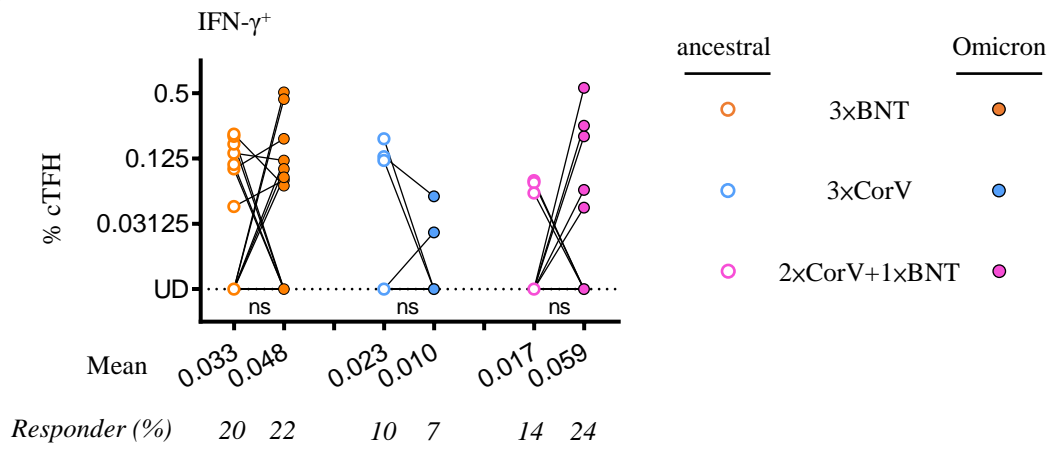

Supplement: mmc8.pdf [file mmc8.pdf]
